# Supplementary material
Source: PubMed Central journal article supplement (PMC4136084)
Supplement: AEM.01239-14_zam999105624so1.pdf [file AEM.01239-14_zam999105624so1.pdf]

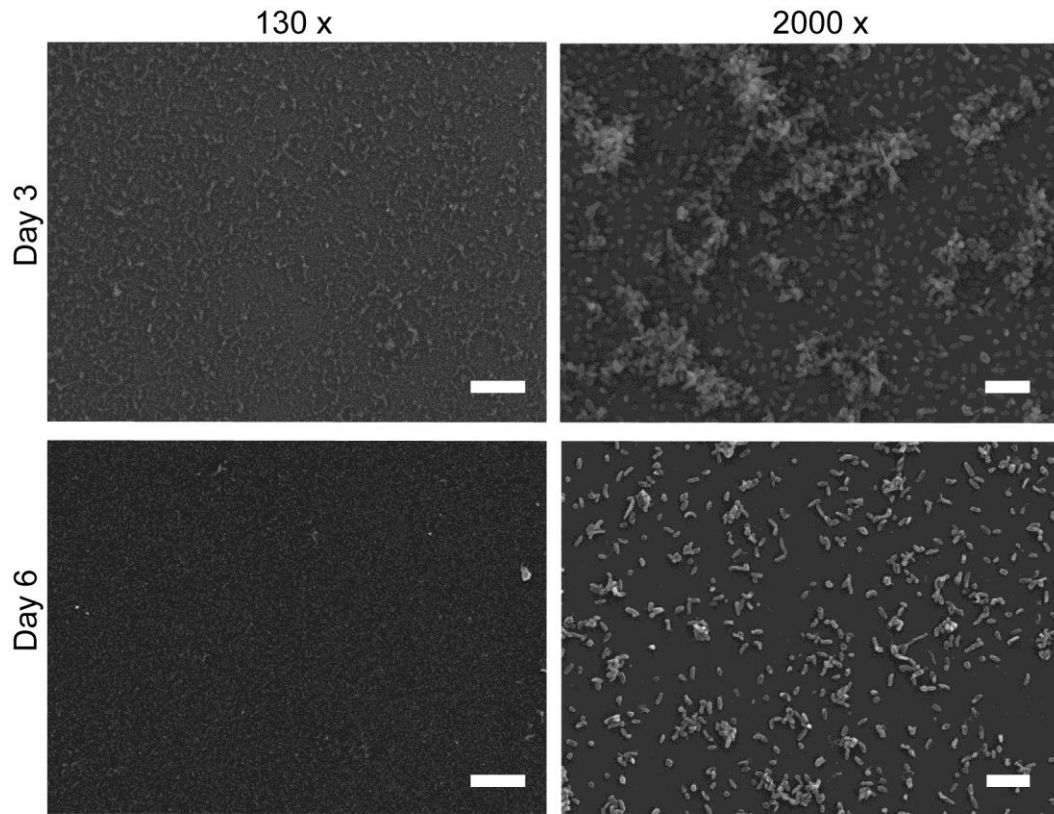

**FIG S1** SEM analyses of *Vibrio salmonicida* LFI1238 biofilms after 3 and 6 days growth. The biofilms were grown in SWT medium at 4°C before being fixated. The pictures to the left show the biofilm at 130 x magnification (bar size 100 mm), and the pictures to the right show the biofilm at 2000 x magnification (bar size 5 mm).

**TABLE S1** Plasmid profiles of *Vibrio salmonicida* LFI1238 and the wild type strains included in the study <sup>a</sup>

| Name      | Localisation | Profile in kDa   | Group |
|-----------|--------------|------------------|-------|
| NCMB 2262 | Type strain  | 21, 3.4          | A     |
| VS26      | Seløy        | 21, 3.4          | A     |
| VS295     | Trangereid   | 21, 3.4          | A     |
| VS446     | Sjøvegen     | 21, 3.4, 2.8     | B     |
| VS224     | Kristiansund | 21, 3.4, 2.8     | B     |
| VS12      | Strønstad    | 61, 21           | C     |
| VS201     | Aukra        | 21               | D     |
| VS103     | Valevåg      | 21, 5.5, 2.8     |       |
| VS370     | Krokeldalen  | 61, 21, 6.7      |       |
| VS498     | Hammerfest   | 61, 21, 3.4, 2.8 |       |
| LFI1238   | Hammerfest   | 61, 21, 3.4, 2.8 |       |

<sup>a</sup> The plasmid profiles of the ten wild type isolates were analyzed by Sørnum and co-workers (Sørnum et al., J. Clin. Microbiol. 26:1679-1683, 1988). One isolate shows the same plasmid profile as LFI1238 (Hjerde et al., BMC Genomics 9:616, 2008), whereas seven isolates have plasmid profiles belonging to the four main groups A to D. The two remaining isolates show plasmid profiles not belonging to either group.

**TABLE S2** Complete list of upregulated genes ( $\text{Log}_2$  ratios  $< -1.0$  and P-values  $< 0.05$ ) in the *ΔlitR* mutant compared to wild type LF11238 after growth in suspension.

| CDS         | Gene product                                                          | $\text{Log}_2$ ratio | Adjusted P-value |
|-------------|-----------------------------------------------------------------------|----------------------|------------------|
| VSAL_I1325  | proton glutamate symport protein                                      | -3.01                | 2.01E-02         |
| VSAL_I1328  | putative membrane associated peptidase                                | -2.86                | 3.98E-05         |
| VSAL_II0312 | hypothetical protein, putative anti-sigma factor antagonist           | -2.66                | 2.91E-04         |
| VSAL_II0297 | putative glycosyl transferase                                         | -2.54                | 5.73E-04         |
| VSAL_I0550  | endA endonuclease I precursor                                         | -2.48                | 2.86E-04         |
| VSAL_I1342  | hypothetical protein                                                  | -2.46                | 3.05E-03         |
| VSAL_II0304 | putative glycosyl transferase                                         | -2.13                | 2.98E-02         |
| VSAL_I1608  | galR HTH-type transcriptional regulator GalR                          | -2.13                | 2.46E-04         |
| VSAL_II0311 | outer membrane protein, OmpA family                                   | -2.05                | 1.87E-03         |
| VSAL_II0662 | putative signaling protein                                            | -1.92                | 4.29E-04         |
| VSAL_II0296 | putative transmembrane glycosyl transferase                           | -1.82                | 7.55E-03         |
| VSAL_II0308 | putative response regulator                                           | -1.80                | 5.44E-03         |
| VSAL_II1079 | nfsA NADPH-flavin oxidoreductase                                      | -1.73                | 1.73E-02         |
| VSAL_II0302 | putative polysaccharide biosynthesis protein                          | -1.70                | 4.27E-03         |
| VSAL_II0298 | putative membrane protein                                             | -1.62                | 3.16E-02         |
| VSAL_II0825 | sgcA putative phosphotransferase enzyme II                            | -1.57                | 5.53E-02         |
| VSAL_I1344  | sdaC serine transporter                                               | -1.52                | 3.74E-03         |
| VSAL_II0138 | hypothetical protein                                                  | -1.52                | 1.79E-03         |
| VSAL_II0609 | putative exported protein                                             | -1.41                | 5.48E-02         |
| VSAL_II0818 | hypothetical protein                                                  | -1.40                | 2.64E-03         |
| VSAL_I3166t | tRNA-Ser tRNA-Ser undefined product 2016247:2016331 forward           | -1.38                | 1.98E-02         |
| VSAL_I0696  | conserved hypothetical protein                                        | -1.36                | 1.14E-02         |
| VSAL_I2136  | nspC carboxynorspermidine decarboxylase                               | -1.34                | 1.45E-02         |
| VSAL_II1088 | putative membrane protein                                             | -1.33                | 4.03E-02         |
| VSAL_I1003  | putative HTH-type transcriptional regulator                           | -1.33                | 9.93E-04         |
| VSAL_I2294  | putative type IV pilus assembly (PilZ) protein                        | -1.33                | 9.36E-03         |
| VSAL_I1609  | sodium/proton antiporter                                              | -1.30                | 1.01E-02         |
| VSAL_II0102 | msrAB peptide methionine sulfoxide reductase                          | -1.28                | 4.77E-03         |
| VSAL_I0144  | transposase                                                           | -1.27                | 6.57E-03         |
| VSAL_II0984 | putative exported protein                                             | -1.26                | 8.35E-03         |
| VSAL_II0249 | putative exported protein                                             | -1.24                | 7.24E-03         |
| VSAL_I2330  | flgJ peptidoglycan hydrolase FlgJ                                     | -1.23                | 1.11E-02         |
| VSAL_II0823 | PTS system, lactose/cellobiose specific IIB subunit                   | -1.22                | 1.76E-04         |
| VSAL_I2747  | metB cystathionine gamma-synthase (O-succinylhomoserin (thiol)-lyase) | -1.22                | 2.27E-02         |
| VSAL_I2138  | putative diamminobutyrate--2-oxoglutarate aminotransferase            | -1.21                | 2.27E-02         |
| VSAL_I2328  | flgL flagellar hook-associated protein type 3 FlgL                    | -1.17                | 2.09E-02         |
| VSAL_II0821 | putative exported protein                                             | -1.16                | 3.09E-02         |
| VSAL_I0606  | putative signaling protein                                            | -1.13                | 3.63E-02         |
| VSAL_I2117  | methyl-accepting chemotaxis protein (fragment)                        | -1.13                | 2.53E-02         |
| VSAL_I2605  | dksA DnaK suppressor protein                                          | -1.11                | 1.92E-02         |
| VSAL_I2306  | fliH polar flagellar assembly protein FliH                            | -1.11                | 3.68E-02         |
| VSAL_I1499  | putative exported protein                                             | -1.09                | 2.85E-03         |
| VSAL_I2741  | putative cell division protein FtsN                                   | -1.05                | 2.23E-02         |
| VSAL_I0886  | metN D-methionine transport ATP-binding protein MetN                  | -1.04                | 2.82E-02         |
| VSAL_II0451 | hypothetical protein                                                  | -1.04                | 5.40E-03         |
| VSAL_I0008  | putative amino acid ABC transporter. substrate-binding protein        | -1.03                | 2.50E-02         |
| VSAL_I2308  | fliF polar flagellar M-ring protein FliF (pseudogene)                 | -1.03                | 1.02E-02         |
| VSAL_I1537  | membrane protein                                                      | -1.00                | 2.26E-02         |

**TABLE S3** Complete list of downregulated genes ( $\text{Log}_2$  ratio  $> 1.0$  and P-values  $< 0.05$ ) in the *ΔlitR* mutant compared to wild type LF11238 after growth in suspension.

| CDS          | Gene product                                                        | $\text{Log}_2$ ratio | Adjusted P-value |
|--------------|---------------------------------------------------------------------|----------------------|------------------|
| VSAL_I2619   | litR HTH-type luminescence regulator LitR                           | 5.11                 | 4.17E-09         |
| VSAL_II0322  | putative membrane protein                                           | 3.48                 | 2.21E-02         |
| VSAL_II0328  | spoIIAA putative anti-sigma F factor antagonist                     | 2.97                 | 5.32E-03         |
| VSAL_II0323  | putative lipoprotein                                                | 2.80                 | 2.74E-02         |
| VSAL_II0324  | putative lipoprotein                                                | 2.77                 | 7.67E-03         |
| VSAL_I1197   | gadA2 glutamate decarboxylase beta                                  | 2.71                 | 4.04E-04         |
| VSAL_I2057   | aapJ general L-amino acid-binding periplasmic protein precursor     | 2.54                 | 4.39E-03         |
| VSAL_II0326  | hypothetical protein                                                | 2.50                 | 1.08E-02         |
| VSAL_II0321  | putative glycosyl transferase                                       | 2.42                 | 7.28E-03         |
| VSAL_I4020s  | VSsrna21 VSsrna21 undefined product 246429:246594 reverse           | 2.35                 | 1.71E-02         |
| VSAL_II0319  | rpoS RNA polymerase sigma factor                                    | 2.27                 | 5.34E-03         |
| VSAL_II0066  | membrane protein                                                    | 2.22                 | 3.79E-02         |
| VSAL_I1198   | probable membrane permease                                          | 2.16                 | 5.50E-03         |
| VSAL_II0327  | putative nucleotidyl transferase                                    | 2.13                 | 5.39E-02         |
| VSAL_II0054  | hypothetical protein                                                | 2.12                 | 1.73E-03         |
| VSAL_I1290   | outer membrane protein. OmpA family (pseudogene)                    | 2.00                 | 2.38E-02         |
| VSAL_I2208   | prkA putative PrkA serine protein kinase                            | 1.96                 | 2.76E-03         |
| VSAL_I1394   | hypothetical protein                                                | 1.92                 | 5.87E-03         |
| VSAL_II0332  | putative hemolysin-type calcium-binding protein (fragment)          | 1.88                 | 3.11E-02         |
| VSAL_I0395   | hypothetical protein, putative phage gene (fragment)                | 1.84                 | 2.11E-02         |
| VSAL_I2207   | conserved hypothetical protein                                      | 1.79                 | 1.30E-02         |
| VSAL_I1395   | membrane protein                                                    | 1.67                 | 1.66E-02         |
| VSAL_p840_56 | hypothetical protein                                                | 1.64                 | 1.60E-03         |
| VSAL_I0755   | membrane protein                                                    | 1.57                 | 1.35E-03         |
| VSAL_I1456   | rimL ribosomal-protein-serine acetyltransferase                     | 1.43                 | 1.44E-02         |
| VSAL_I1590   | qnr quinolone resistance determinant QnrC                           | 1.30                 | 3.19E-03         |
| VSAL_II0059  | putative type I toxin secretion system. membrane transport protein  | 1.29                 | 4.94E-02         |
| VSAL_II0238  | glgC glucose-1-phosphate adenylyltransferase                        | 1.28                 | 6.76E-03         |
| VSAL_I2438   | aceA isocitrate lyase                                               | 1.26                 | 3.77E-03         |
| VSAL_II0444  | binding-protein-dependent transport system inner membrane component | 1.25                 | 3.47E-02         |
| VSAL_I1484   | short chain dehydrogenase                                           | 1.21                 | 5.94E-03         |
| VSAL_II0480  | pspF psp operon transcriptional activator PspF                      | 1.16                 | 2.51E-02         |
| VSAL_II0040  | glgB 1.,4-alpha-glucan branching enzyme (fragment)                  | 1.15                 | 2.37E-02         |
| VSAL_I0588   | ompD major outer membrane protein OmpU                              | 1.13                 | 2.60E-02         |
| VSAL_I1177   | clpB chaperone ClpB-1                                               | 1.12                 | 4.59E-02         |
| VSAL_II0020  | hemolysin-type calcium-binding protein                              | 1.09                 | 2.03E-02         |
| VSAL_I2736   | hypothetical protein                                                | 1.07                 | 2.96E-02         |
| VSAL_I2879   | pssA CDP-diacylglycerol--serine O-phosphatidyltransferase           | 1.05                 | 8.39E-03         |
| VSAL_I2214   | clpA ATP-dependent Clp protease ATP-binding subunit ClpA            | 1.01                 | 2.19E-02         |

**TABLE S4** Complete list of upregulated genes ( $\text{Log}_2$  ratios  $< -1.0$  and P-values  $< 0.05$ ) in the *ΔlitR* mutant compared to wild type LF11238 grown as biofilms.

| CDS         | Gene product                                                          | Log2 ratio | Adjusted P-value |
|-------------|-----------------------------------------------------------------------|------------|------------------|
| VSAL_II0297 | putative glycosyl transferase                                         | -5.17      | 7.86E-04         |
| VSAL_II0249 | putative exported protein                                             | -4.93      | 4.28E-03         |
| VSAL_II1000 | hypothetical protein (pseudogene)                                     | -4.79      | 1.38E-06         |
| VSAL_II1001 | putative lipoprotein                                                  | -4.45      | 3.28E-03         |
| VSAL_II0313 | putative exported protein                                             | -4.38      | 5.87E-03         |
| VSAL_II0312 | hypothetical protein, putative anti-sigma factor antagonist           | -4.34      | 5.76E-04         |
| VSAL_II0311 | outer membrane protein, OmpA family                                   | -4.15      | 1.88E-06         |
| VSAL_II0314 | putative lipoprotein                                                  | -3.85      | 2.17E-04         |
| VSAL_II0300 | hypothetical protein                                                  | -3.73      | 7.80E-03         |
| VSAL_II0304 | putative glycosyl transferase                                         | -3.69      | 1.75E-05         |
| VSAL_II0310 | polysaccharide biosynthesis/export protein                            | -3.64      | 3.34E-05         |
| VSAL_II0299 | putative glycosyl transferases                                        | -3.37      | 1.87E-03         |
| VSAL_II0250 | putative lipoprotein                                                  | -3.35      | 3.34E-02         |
| VSAL_I3165s | VSsrna114 small RNA Qrr                                               | -3.28      | 5.90E-03         |
| VSAL_I1508  | OMT5 putative methyltransferase                                       | -3.26      | 2.78E-04         |
| VSAL_I2667  | degQ exported serine protease                                         | -2.95      | 3.56E-04         |
| VSAL_II0298 | putative membrane protein                                             | -2.88      | 4.90E-03         |
| VSAL_II0302 | putative polysaccharide biosynthesis protein                          | -2.62      | 6.10E-04         |
| VSAL_II0303 | putative glycosyl transferase                                         | -2.46      | 3.57E-03         |
| VSAL_II0296 | putative transmembrane glycosyl transferase                           | -2.45      | 9.51E-03         |
| VSAL_I1328  | putative membrane associated peptidase                                | -2.23      | 1.69E-02         |
| VSAL_I2864  | csgA curlin associated precursor, CsgA like                           | -2.02      | 4.49E-04         |
| VSAL_I3195t | tRNA-Met tRNA-Met undefined product 2893938:2894010 forward           | -2.02      | 5.99E-04         |
| VSAL_I3118t | tRNA tRNA transfer RNA-Asn 561331:561403 reverse                      | -1.88      | 1.36E-02         |
| VSAL_I2530  | rseA sigma-E factor negative regulatory protein                       | -1.84      | 7.33E-04         |
| VSAL_I0859  | hypothetical protein                                                  | -1.75      | 1.68E-02         |
| VSAL_I1608  | galR HTH-type transcriptional regulator GalR                          | -1.72      | 3.92E-03         |
| VSAL_I2064  | conserved hypothetical protein                                        | -1.71      | 4.06E-04         |
| VSAL_II0309 | putative capsular polysaccharide synthesis protein                    | -1.71      | 2.78E-04         |
| VSAL_I1325  | proton glutamate symport protein                                      | -1.68      | 5.10E-02         |
| VSAL_I2857  | csgE assembly/transport component in curli production, CsgE precursor | -1.61      | 5.51E-02         |
| VSAL_II0308 | putative response regulator                                           | -1.57      | 4.42E-02         |
| VSAL_II0102 | mrsAB peptide methionine sulfoxide reductase                          | -1.53      | 3.44E-03         |
| VSAL_I2992  | MFS transporter                                                       | -1.52      | 6.70E-03         |
| VSAL_I4092s | VSsrna93 VSsrna93 undefined product 1673822:1674022 reverse           | -1.47      | 6.08E-03         |
| VSAL_II0437 | hypothetical protein                                                  | -1.43      | 5.20E-02         |
| VSAL_I2564  | putative lipoprotein                                                  | -1.42      | 3.54E-02         |
| VSAL_I2549  | hypothetical protein                                                  | -1.33      | 1.27E-03         |
| VSAL_I3177t | tRNA-Arg tRNA-Arg undefined product 2350401:2350474 forward           | -1.33      | 5.33E-02         |
| VSAL_I0501  | yrbK putative membrane protein                                        | -1.31      | 2.65E-03         |
| VSAL_I2172  | hypothetical protein                                                  | -1.29      | 4.19E-02         |
| VSAL_II0079 | zinc carboxypeptidase                                                 | -1.25      | 5.80E-03         |
| VSAL_I2495  | hypothetical protein                                                  | -1.25      | 8.61E-03         |
| VSAL_I0722  | fdx 2Fe-2S ferredoxin                                                 | -1.23      | 2.53E-03         |
| VSAL_I3117t | tRNA-Leu tRNA-Leu undefined product 560225:560306 forward             | -1.23      | 1.47E-02         |
| VSAL_I2111  | membrane protein                                                      | -1.21      | 4.80E-02         |
| VSAL_II0587 | outer membrane protein, OmpA family                                   | -1.19      | 1.34E-02         |
| VSAL_I0737  | guaB inosine-5'-monophosphate dehydrogenase                           | -1.19      | 7.09E-03         |
| VSAL_I2832  | putative exonuclease                                                  | -1.18      | 3.18E-02         |

|             |                                                             |       |          |
|-------------|-------------------------------------------------------------|-------|----------|
| VSAL_I0643  | gshA glutamate--cysteine ligase                             | -1.17 | 1.74E-02 |
| VSAL_I1786  | putative iron-regulated protein                             | -1.15 | 4.50E-02 |
| VSAL_I3157t | tRNA-Ser tRNA-Ser undefined product 1120410:1120497 reverse | -1.14 | 4.97E-03 |
| VSAL_I2349  | putative exported protein                                   | -1.12 | 4.52E-02 |
| VSAL_II0614 | cold shock-like protein                                     | -1.12 | 3.08E-02 |
| VSAL_I3161t | tRNA-Val tRNA-Val undefined product 1804642:1804714 reverse | -1.10 | 2.74E-02 |
| VSAL_I1939  | ppiB peptidyl-prolyl cis-trans isomerase B                  | -1.09 | 4.73E-02 |
| VSAL_I0563  | dsbC thiol/disulfide interchange protein DsbC precursor     | -1.08 | 1.11E-03 |
| VSAL_I0101  | putative membrane protein                                   | -1.06 | 3.61E-02 |
| VSAL_I2031  | hexR HTH-type transcriptional regulator HexR                | -1.05 | 2.53E-02 |
| VSAL_II0466 | putative membrane protein (fragment)                        | -1.02 | 2.60E-02 |
| VSAL_I1554  | putative exported protein                                   | -1.02 | 1.51E-02 |
| VSAL_I1321  | hypothetical protein                                        | -1.01 | 6.75E-03 |
| VSAL_II0301 | O-antigen polymerase                                        | -1.01 | 5.30E-02 |
| VSAL_I1842  | lolA outer-membrane lipoprotein carrier protein precursor   | -0.98 | 5.16E-02 |

---

**TABLE S5** Complete list of downregulated genes ( $\text{Log}_2$  ratio  $> 1.0$  and P-values  $< 0.05$ ) in the *ΔlitR* mutant compared to the wild type LFI1238 grown as biofilms.

| CDS          | Gene product                                                    | Log2 ratio | Adjusted P-value |
|--------------|-----------------------------------------------------------------|------------|------------------|
| VSAL_I2619   | litR HTH-type luminescence regulator LitR                       | 4.33       | 9.46E-05         |
| VSAL_I1132   | putative outer membrane protein                                 | 2.25       | 4.20E-04         |
| VSAL_p54_03  | putative replication initiation protein                         | 2.10       | 3.15E-02         |
| VSAL_I1456   | rimL ribosomal-protein-serine acetyltransferase                 | 2.10       | 1.88E-02         |
| VSAL_I0018   | groS 10 kDa chaperonin 1                                        | 2.07       | 4.73E-02         |
| VSAL_II0323  | putative lipoprotein                                            | 2.05       | 3.81E-03         |
| VSAL_I2739   | hslU ATP-dependent hsl protease ATP-binding subunit HslU        | 1.86       | 9.66E-03         |
| VSAL_II0054  | hypothetical protein                                            | 1.84       | 2.15E-02         |
| VSAL_I0588   | ompD major outer membrane protein OmpU                          | 1.82       | 3.82E-03         |
| VSAL_I2471   | dnaK chaperone protein DnaK (heat shock protein 70)             | 1.68       | 9.15E-03         |
| VSAL_I0017   | groEL 60 kDa chaperonin 1                                       | 1.67       | 4.00E-02         |
| VSAL_I2310   | ntrC sigma-54 dependent response regulator                      | 1.63       | 4.76E-02         |
| VSAL_I3061   | atpA ATP synthase alpha subunit                                 | 1.55       | 2.48E-03         |
| VSAL_II0332  | putative hemolysin-type calcium-binding protein (fragment)      | 1.55       | 3.41E-03         |
| VSAL_II0327  | putative nucleotidyl transferase                                | 1.48       | 1.13E-02         |
| VSAL_II0010  | conserved hypothetical protein                                  | 1.45       | 1.69E-02         |
| VSAL_I0556   | pgk phosphoglycerate kinase                                     | 1.44       | 1.59E-02         |
| VSAL_I0122   | prlC oligopeptidase A                                           | 1.42       | 7.13E-03         |
| VSAL_I0565   | prfB peptide chain release factor 2 (RF-2) (pseudogene)         | 1.41       | 8.83E-03         |
| VSAL_I2292   | flhF flagellar biosynthesis protein FlhF                        | 1.39       | 3.97E-03         |
| VSAL_I2641   | ftsA cell division protein FtsA                                 | 1.37       | 2.84E-02         |
| VSAL_II0320  | putative membrane associated signaling protein                  | 1.36       | 2.07E-02         |
| VSAL_p840_23 | pilT transglycosylase PilT                                      | 1.35       | 5.07E-02         |
| VSAL_I0087   | ilvC ketol-acid reductoisomerase                                | 1.34       | 7.27E-03         |
| VSAL_II0319  | rpoS RNA polymerase sigma factor                                | 1.34       | 1.34E-02         |
| VSAL_I0814   | htpG chaperone protein HtpG (heat shock protein HtpG)           | 1.34       | 1.31E-02         |
| VSAL_I0620   | deoA thymidine phosphorylase                                    | 1.33       | 1.95E-02         |
| VSAL_I3060   | atpG ATP synthase gamma subunit                                 | 1.33       | 1.25E-02         |
| VSAL_I0311   | rpsG 30S ribosomal protein S7                                   | 1.33       | 3.26E-02         |
| VSAL_I0447   | uvrA UvrABC system protein A                                    | 1.33       | 1.47E-04         |
| VSAL_I0634   | recA protein RecA (recombinase A)                               | 1.32       | 2.43E-04         |
| VSAL_I3063   | atpF ATP synthase B chain                                       | 1.31       | 1.47E-02         |
| VSAL_II0497  | conserved hypothetical protein                                  | 1.29       | 1.15E-03         |
| VSAL_I2057   | aapJ general L-amino acid-binding periplasmic protein precursor | 1.29       | 1.90E-03         |
| VSAL_II0056  | putative type I secretion protein, HlyD family                  | 1.28       | 4.18E-02         |
| VSAL_II0504  | signal transduction protein, histidine kinase                   | 1.25       | 4.19E-03         |
| VSAL_I2595   | acnB aconitate hydratase 2 (citrate hydro-lyase 2)              | 1.24       | 7.04E-03         |
| VSAL_I0519   | pyrB aspartate carbamoyltransferase catalytic subunit           | 1.23       | 9.98E-03         |
| VSAL_I0664   | rluD ribosomal large subunit pseudouridine synthase D           | 1.22       | 2.85E-02         |
| VSAL_I2214   | clpA ATP-dependent Clp protease ATP-binding subunit ClpA        | 1.19       | 1.88E-03         |
| VSAL_I3058   | atpC ATP synthase epsilon subunit                               | 1.18       | 1.09E-02         |
| VSAL_I3062   | atpH ATP synthase delta subunit                                 | 1.17       | 2.21E-02         |
| VSAL_I0817   | tig trigger factor (TF)                                         | 1.15       | 1.02E-02         |
| VSAL_p840_19 | putative exported protein                                       | 1.11       | 1.25E-03         |
| VSAL_I1238   | exported serine protease (pseudogene)                           | 1.11       | 3.25E-02         |
| VSAL_II0328  | spoIIAA putative anti-sigma F factor antagonist                 | 1.10       | 2.74E-02         |
| VSAL_I2867   | rpL 50S ribosomal subunit protein L7/L12                        | 1.09       | 1.92E-02         |
| VSAL_I0310   | rpsL 30S ribosomal protein S12                                  | 1.07       | 3.55E-02         |
| VSAL_I2927   | hslO 33 kDa chaperonin (heat shock protein 33)                  | 1.06       | 1.80E-02         |

|             |                                                                 |      |          |
|-------------|-----------------------------------------------------------------|------|----------|
| VSAL_II0238 | glgC glucose-1-phosphate adenylyltransferase                    | 1.06 | 3.05E-02 |
| VSAL_I2302  | fliL polar flagellar protein FliL                               | 1.06 | 2.94E-02 |
| VSAL_II0280 | integral membrane protein                                       | 1.04 | 2.95E-02 |
| VSAL_I2427  | rpsB 30S ribosomal protein S2                                   | 1.03 | 8.80E-03 |
| VSAL_I2426  | tsf elongation factor TS                                        | 1.03 | 3.96E-02 |
| VSAL_I2697  | rpoD RNA polymerase sigma factor RpoD (sigma-70)                | 1.02 | 2.73E-02 |
| VSAL_I3010  | neuD putative capsular polysaccharide biosynthesis protein NeuD | 1.01 | 1.94E-02 |
| VSAL_I0377  | leuA 2-isopropylmalate synthase                                 | 1.00 | 6.58E-03 |
| VSAL_I0191  | rpmB 50S ribosomal protein L28                                  | 1.00 | 2.05E-02 |
| VSAL_II0329 | putative response regulator                                     | 0.99 | 3.06E-02 |

---
